# Supplementary material for: From crypsis to mimicry: changes in colour and the configuration of the visual system during ontogenetic habitat transitions in a coral reef fish
Source: Oxford University Press journal article supplement (doi:10.1242/jeb.139501), 2016-01-01
Supplement: jeb139501supp.pdf [file jeb139501supp.pdf]

## SUPPLEMENTARY FIGURES

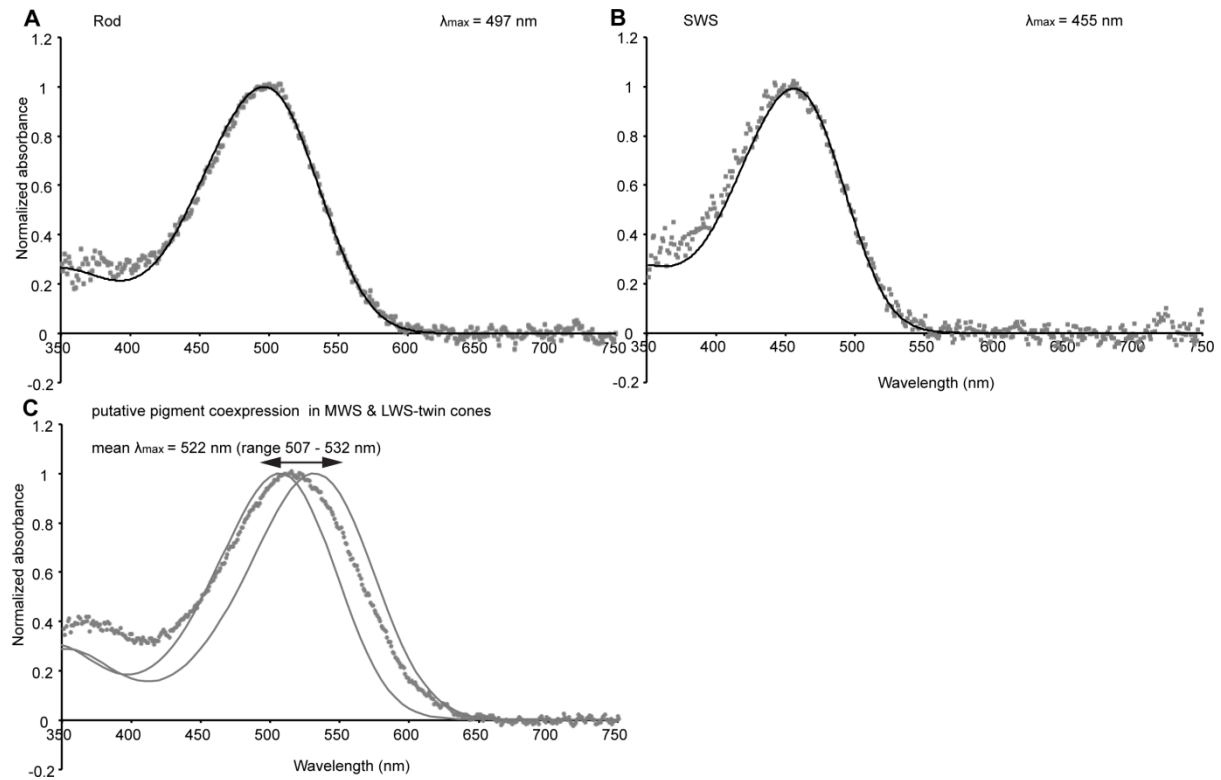

**Fig. S1. Normalized pre-bleach absorbance spectra of the coral trout visual pigments (measured with MSP).** (A) The visual pigment found in the rod photoreceptor used for scotopic vision ( $n = 22$ ), (B) the ‘blue’ SWS single cone ( $n = 10$ ), (C) the mean of the broad absorbance spectra found in the twin cones (MWS and LWS) and thought to be the result of a coexpression of two visual pigments with a range of 507 – 532 nm  $\lambda_{\max}$  ( $n = 48$ ). Spectra are fitted with Vitamin A1 rhodopsin templates of the appropriate  $\lambda_{\max}$  calculated using the equations of Stavenga et al., 1993. Note that in (C) no visual templates were fitted, instead the A1 based visual templates for 507 nm and 532 nm  $\lambda_{\max}$  are shown in grey.

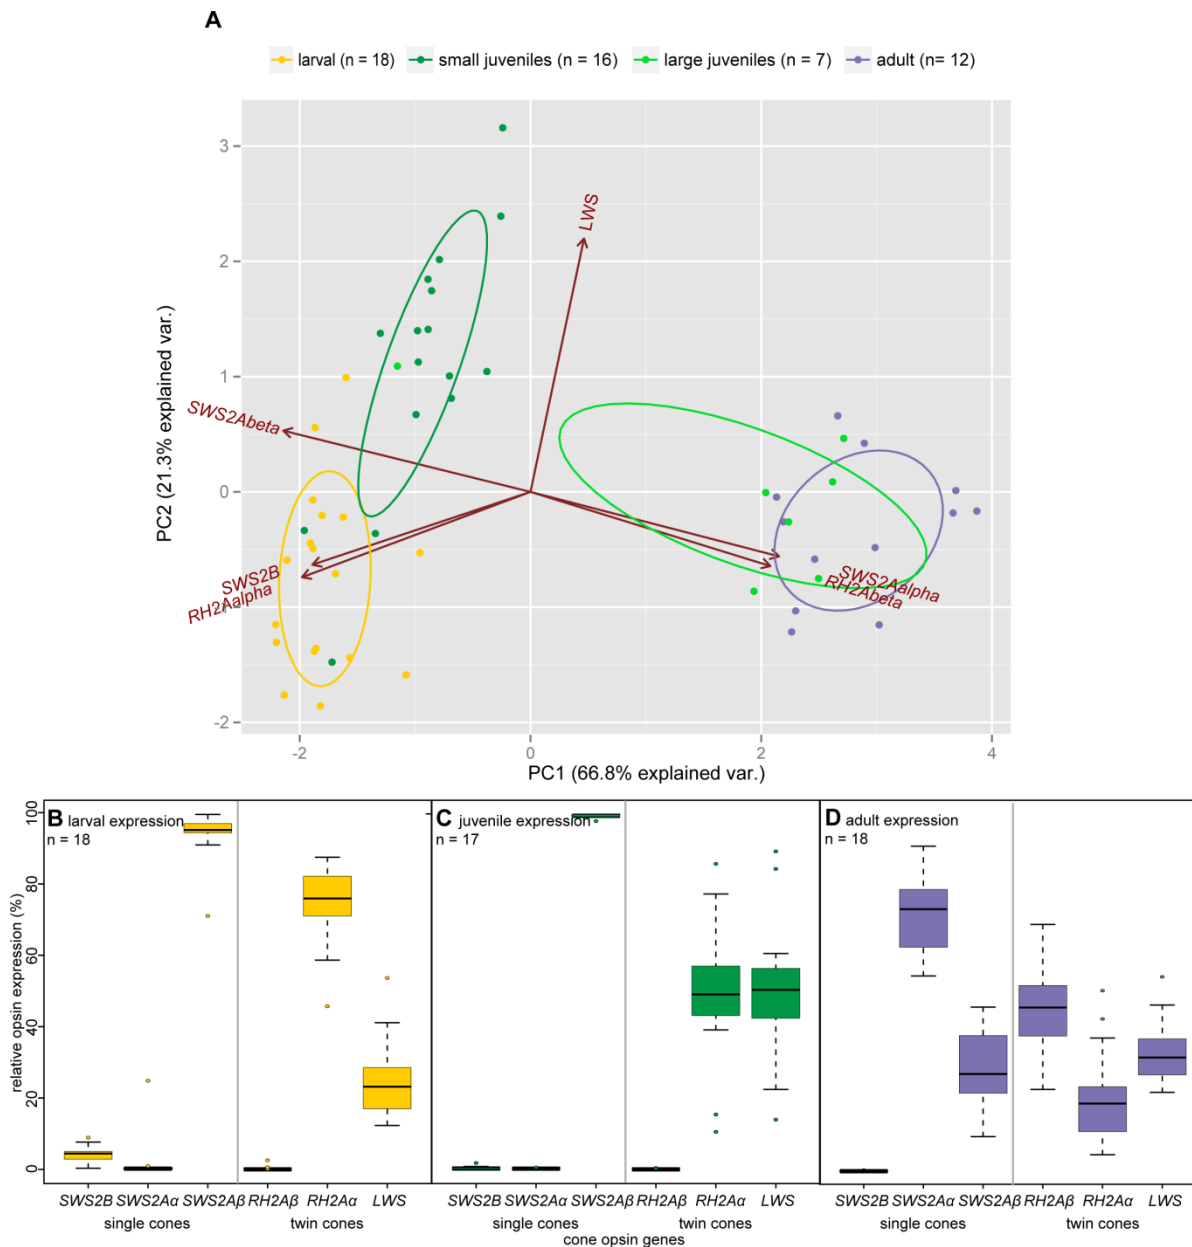

**Fig. S2. Difference in opsin gene expression throughout dottyback ontogeny.**

(A) A principle component analysis (PCA) shows dottyback cone opsin expression of larvae prior to settlement and one day post settlement (dps) in yellow (n = 18), small juveniles (7 – 9 dps and 34 dps) in dark green (n = 16), large juveniles in bright green (n = 7), and adults in violet (n = 12). The lines indicate differences in gene expression between individuals, separating ontogenetic stages into three distinct expression profiles: (B) larval-expression (n = 18), (C) juvenile-expression (n = 17), and (D) adult expression (n = 18). Note that the smallest of the large juveniles at 19 mm standard length (SL) clusters together with individuals of the juvenile-expression profile, while the remaining large juveniles (> 26 mm SL) already show an adult-expression profile. Gene expression was calculated for single and twin cone genes separately.

**Table S1. Spectral characteristics of visual pigment found in the scotopic rod, and the photopic single cone and twin cone photoreceptors of the coral trout, *Plectropomus leopardus*.** Both twin cone members showed broad absorbance spectra that are likely to be caused by pigment coexpression within outer segments with a range of 507 – 532 nm  $\lambda_{\max}$  (also see discussion in the main article; Fig. S1).

|                                         | single cone        | twin cone                                     | rod                |
|-----------------------------------------|--------------------|-----------------------------------------------|--------------------|
| Morphological distinction               | SWS                | broad spectra<br>(coexpression?)<br>MWS & LWS |                    |
| $\lambda_{\max}$ mean $\pm$ s.e.        |                    |                                               |                    |
| pre-bleach absorbance spectra (nm)      | 455.4<br>$\pm$ 0.7 | 522.1<br>$\pm$ 0.9                            | 496.5<br>$\pm$ 0.6 |
| difference spectra (nm)                 | 457.3<br>$\pm$ 1.6 | 522.8<br>$\pm$ 1.1                            | 501.9<br>$\pm$ 1.2 |
| no. cells pre-bleach/difference spectra | 10 / 11            | 48 / 39                                       | 22 / 23            |

**Table S2. qRT-PCR and pool primers used in this study**

| method            | gene (efficiency)                    | primer name                   | orientat ion | primer sequence           |
|-------------------|--------------------------------------|-------------------------------|--------------|---------------------------|
| qRT_PCR           | SWS1 (90%)<br>qPCR primers           | <i>Pfus_SWS1_2F</i>           | forward      | TTTTGGAGCCTTCAAGTTCACCAG  |
|                   |                                      | <i>Pfus_SWS1_23R</i>          | reverse      | GATGTACCTGCTCCAGCCAAAG    |
| qRT_PCR           | SWS2B (94%)<br>qPCR primers          | <i>Pfus_SWS2B_1F1</i>         | forward      | CCGTGGGCTCCTTCACCTG       |
|                   |                                      | <i>Pfus_SWS2B_12R1</i>        | reverse      | GGCTCACCATGCCTCCAATC      |
| qRT_PCR           | SWS2A $\alpha$ (96%)<br>qPCR primers | <i>Pfus_SWS2Aalpha_12F1</i>   | forward      | CATGGCAACACTCGGGGGTATG    |
|                   |                                      | <i>Pfus_SWS2Aalpha_2R1</i>    | reverse      | CGCAAACACCCAGGTGAACC      |
| qRT_PCR           | SWS2A $\beta$ (96%)<br>qPCR primers  | <i>Pfus_SWS2Abeta_1F2</i>     | forward      | GGTGAACCTGGCTGCCGCG       |
|                   |                                      | <i>Pfus_SWS2Abeta_12R1</i>    | reverse      | CCATACCTCCAAGTGTGCTAC     |
| qRT_PCR           | RH2B (91%)<br>qPCR primers           | <i>Pfus_RH2B_23R_new</i>      | forward      | TGTACCTCGACCAGCCCACC      |
|                   |                                      | <i>Pfus_RH2B_2F_new</i>       | reverse      | TGTGGTCTGTAAACCTATGGGC    |
| qRT_PCR           | RH2A $\alpha$ (tba)<br>qPCR primers  | <i>qPCR_RH2Aa_ex4_F1</i>      | forward      | GCTGCCTTCACCGCCCTC        |
|                   |                                      | <i>qPCR_RH2Aa_ex45_R1</i>     | reverse      | GTCAGCATGCAGTTACGGAAC     |
| qRT_PCR           | RH2A $\beta$ (tba)<br>qPCR primers   | <i>qRH2Abeta_ex2_F1</i>       | forward      | GGAGCTTCAAGTTCGGTGGAT     |
|                   |                                      | <i>qRH2Abeta_ex23_R1</i>      | reverse      | ATGTACCTGGACCAGCCAGC      |
| qRT_PCR           | LWS (91%)<br>qPCR pool               | <i>PFus_LWS_34_F1</i>         | forward      | TGTCTCAACCTGTGGTATTACTGC  |
|                   |                                      | <i>PFus_LWS_4_R1</i>          | reverse      | GGATCCCACCTGTGGCCCAT      |
| Sanger sequencing | SWS1<br>qPCR pool                    | <i>POOL_Pfus_SWS1_F</i>       | forward      | CTGTGTGCCATGGAGTCTGCC     |
|                   |                                      | <i>SWS1_R2d_dam</i>           | reverse      | TCGTTGTGGGTGTACCAGTC      |
| Sanger sequencing | SWS2B<br>qPCR pool                   | <i>POOL_Pfus_SWS2B_F</i>      | forward      | GTGACTGGTACTGCCATCAATATC  |
|                   |                                      | <i>POOL_Pfus_SWS2B_R</i>      | reverse      | AACGATGGTGAAGAAGGGGATGGAA |
| Sanger sequencing | SWS2A $\alpha$<br>qPCR pool          | <i>POOL_Pfus_SWS2Aalpha_F</i> | forward      | CTCACTATTGCATGCACCGCC     |
|                   |                                      | <i>POOL_Pfus_SWS2Aalpha_R</i> | reverse      | GCCCATGCCAGCATCGCT        |
| Sanger sequencing | SWS2A $\beta$<br>qPCR pool           | <i>POOL_Pfus_SWS2Abeta_F</i>  | forward      | CTTACCGTTGCATGCACCGTG     |
|                   |                                      | <i>POOL_Pfus_SWS2Abeta_R</i>  | reverse      | TCCACTCATCCCCAGCATCTTC    |
| Sanger sequencing | RH2B<br>qPCR pool                    | <i>RH2B_F2_Fuscus</i>         | forward      | TTA TCCTGGTTAACTTGGC      |
|                   |                                      | <i>Rh2B_R2c_dam</i>           | reverse      | ATCACATAGGATTTCGTTGTTG    |
| Sanger sequencing | RH2A $\alpha$<br>qPCR pool           | <i>poolRH2Aalpha_ex1_F1</i>   | forward      | TCCAACAGGACTGGGATAAC      |
|                   |                                      | <i>poolRH2Aalpha_ex5_R1</i>   | reverse      | CCATCCCAATAGTCGTAG        |
| Sanger sequencing | RH2A $\beta$<br>qPCR pool            | <i>poolRH2Abeta_ex1_F1</i>    | forward      | CCAACAGGACGGGGATTGT       |
|                   |                                      | <i>poolRH2Abeta_ex5_R1</i>    | reverse      | GCCACCCATTCCAATAGTG       |
| Sanger sequencing | LWS<br>qPCR pool                     | <i>LWS_R4dFin_dam</i>         | forward      | CCCAAACGAAGAACATGGA       |
|                   |                                      | <i>LWS_F6d_dam</i>            | reverse      | AAGTTC AAGAACTCCGTC A     |
